# Supplementary material
Source: PubMed Central journal article supplement (PMC4876961)
Supplement: NIHMS784687-supplement-Supplemental.pdf [file NIHMS784687-supplement-Supplemental.pdf]

---

**Article name: Copy number and haplotype variation at the *VRN-A1* and central *FR-A2* loci are associated with frost tolerance in hexaploid wheat**

**Journal name: Theoretical and Applied Genetics**

**Author names:** Jie Zhu<sup>1\*</sup>, Stephen Pearce<sup>2\*</sup>, Adrienne Burke<sup>3</sup>, Deven Robert See<sup>3,4</sup>, Daniel Z. Skinner<sup>1,3</sup>, Jorge Dubcovsky<sup>2,5</sup> and Kimberly Garland Campbell<sup>1,3</sup>

<sup>1</sup> Crop and Soil Sciences Department, Washington State University, Pullman, WA 99164, USA

<sup>2</sup> Department of Plant Sciences, University of California, Davis, CA 95616, USA

<sup>3</sup> USDA-ARS Wheat Genetics, Quality, Physiology and Disease Research Unit, Washington State University, Pullman, WA 99164-6420, USA

<sup>4</sup> Department of Plant Pathology, Washington State University, Pullman, WA 99164, USA

<sup>5</sup> Howard Hughes Medical Institute and Gordon & Betty Moore Foundation Investigator

**Corresponding authors:**

Kimberly Garland Campbell<sup>1</sup>, Jorge Dubcovsky<sup>2</sup>

<sup>1</sup> USDA-ARS Wheat Genetics, Quality, Physiology and Disease Research Unit, Washington State University

[kgcamp@wsu.edu](mailto:kgcamp@wsu.edu)

Phone: 509 335-0582

Fax: 509 335-2553

<sup>2</sup> Department of Plant Sciences, University of California, Davis

[jdubcovsky@ucdavis.edu](mailto:jdubcovsky@ucdavis.edu)

Phone: 530 752-0701

Fax: 530 752-4361

**Supplemental Materials**

---

**Table S1** List of the 65 winter wheat accessions in the winter panel

**Table S2** List of the 81 spring wheat accessions in the spring panel

**Table S3** Genomic specific primers and PCR conditions used to amplify and sequence the *CBF12*, *CBF14* and *CBF15* homoeologs from the A, B and D genomes of hexaploid wheat

**Table S4** Primers and probes used in the Taqman® assays for the CNV analysis at *VRN-A1* and the central cluster of the *FR-A2* locus. *VRN-A1* and *CO2* assays were adapted from Díaz et al. (2012).

**Table S5:** *T. dicoccoides* accessions used in this study and their *FR-A2* genotype

**Table S6:** qRT-PCR primers and their amplification efficiencies

**Fig. S1** CAPS markers used to distinguish *FR-A2* haplotypes

Lane M: DNA marker. Lane 1: *CBF-A12* band type for ‘FR-A2-S’. Lane 2: *CBF-A12* band type for ‘FR-A2-T’ (*CBF-A12* was digested with *ZraI*). Lane 3: *CBF-A15* band type for ‘FR-A2-S’. Lane 5: *CBF-A15* band type for ‘FR-A2-T’ (*CBF-A15* was digested with *SalI*).

**Table S1** List of the 65 winter wheat accessions in the ‘winter panel’

| <b>FR-A2<br/>Haplotype</b> | <b>N</b> | <b>Origin</b> | <b>Varieties</b>                                                                                                                                                                                                                                                                                                                                                                                                                                                                                                                                                                                                                                                                                                    |
|----------------------------|----------|---------------|---------------------------------------------------------------------------------------------------------------------------------------------------------------------------------------------------------------------------------------------------------------------------------------------------------------------------------------------------------------------------------------------------------------------------------------------------------------------------------------------------------------------------------------------------------------------------------------------------------------------------------------------------------------------------------------------------------------------|
| <b>FR-A2-S</b>             | 7        | France        | Alma (PI 174592),                                                                                                                                                                                                                                                                                                                                                                                                                                                                                                                                                                                                                                                                                                   |
|                            |          | Denmark       | Viking (PI 316424)                                                                                                                                                                                                                                                                                                                                                                                                                                                                                                                                                                                                                                                                                                  |
|                            |          | Germany       | Bussard (PI 300949)                                                                                                                                                                                                                                                                                                                                                                                                                                                                                                                                                                                                                                                                                                 |
|                            |          | Poland        | Mira (PI 338396)                                                                                                                                                                                                                                                                                                                                                                                                                                                                                                                                                                                                                                                                                                    |
|                            |          | USA           | ORFW                                                                                                                                                                                                                                                                                                                                                                                                                                                                                                                                                                                                                                                                                                                |
|                            |          | Serbia        | Sava (PI 323638)                                                                                                                                                                                                                                                                                                                                                                                                                                                                                                                                                                                                                                                                                                    |
|                            |          | Unknown       | Malakov (PI 351207)                                                                                                                                                                                                                                                                                                                                                                                                                                                                                                                                                                                                                                                                                                 |
| <b>FR-A2-T</b>             | 58       | USA           | AGS2000 (PI 612956), Arthur (CItr 14425), Bavaria (PI 606754), Boundary (PI 603039), Chukar (PI 628641), Centurk 78 (CItr 17724), Crimson (PI 601818), Daws (CItr 17419), Eltan (PI 536994), Expedition (PI 629060), Endurance (PI 639233), Frankenmuth (CItr 17830), Freedom (PI 562382), Geneva (PI 505819), Harding (PI 608049), Hopewell (PI 595678), IDO621, Jagger (PI 593688), Jerry (PI 632433), Karl (PI 527480), Millennium (PI 613099), Minhardi (CItr 5149), Moro (CItr 13740), OH552, Redwin (CItr 17844), SD97250, Seward (PI 508289), Simon (PI 636132), Stephens (CItr 17596), Tiber (PI 517194), Trego (PI 612576), Wahoo (PI 619098), Wanser (CItr 13844), Wesley (PI 605742), Xerpha (PI 645605) |
|                            |          | Russia        | Alabasskaja (PI 262636), Albatros Odesskii (PI 565418), Bezostaja 1 (PI 345685), Kavkaz (PI 361879), Ilichevka (PI 410425), Inna (PI 591957), Odesskaja117 (PI 592065), Purkov (CItr 8381)                                                                                                                                                                                                                                                                                                                                                                                                                                                                                                                          |
|                            |          | Ukraine       | Mironovskaja 808 (PI 392080), Volgogradskaja 84 (PI 565410)                                                                                                                                                                                                                                                                                                                                                                                                                                                                                                                                                                                                                                                         |
|                            |          | Finland       | Olympia (PI 175514), Vakka (PI 265483)                                                                                                                                                                                                                                                                                                                                                                                                                                                                                                                                                                                                                                                                              |
|                            |          | Canada        | CDC Kestrel (CN 18797), CDC Clair (CN 106345), Chernova, Norstar (CItr 17735)                                                                                                                                                                                                                                                                                                                                                                                                                                                                                                                                                                                                                                       |
|                            |          | Romania       | F26-67 (PI 367713), Fundulea 158-69 (PI 519086), Fundulea 133 (PI 519268), Fundulea 174-71 (PI 519097), Fundulea 63-70 (PI 519128), Moldova (PI 350311)                                                                                                                                                                                                                                                                                                                                                                                                                                                                                                                                                             |
|                            |          | Switzerland   | Munstertaler (PI 351176)                                                                                                                                                                                                                                                                                                                                                                                                                                                                                                                                                                                                                                                                                            |

<sup>a</sup> Malakov: provenance listed as former USSR, likely originated from Crimea.

**Table S2** List of the 81 spring wheat accessions in the ‘spring panel’

| <i>FR-A2</i> haplotype | N  | Origin        | Varieties                                                                                                                                                                                                                                                                                                                                                                                                                                                                                                                        |
|------------------------|----|---------------|----------------------------------------------------------------------------------------------------------------------------------------------------------------------------------------------------------------------------------------------------------------------------------------------------------------------------------------------------------------------------------------------------------------------------------------------------------------------------------------------------------------------------------|
| <b>FR-A2-S</b>         | 53 | Australia     | Baart (PI 5078), Bobin (PI 106120), Cleveland (PI 89191), Clubhead (PI 116224), Dundee (PI 89424), Eden (PI 224658), Falcon (PI 292578), Florence (PI 38349), Gabo (PI 155431), Gluclub (PI 67326), Gular (PI 113489), Insignia (PI 210975), Steinwedel (PI 41081), Yandilla King (PI 42120)                                                                                                                                                                                                                                     |
|                        |    | North America | 24IBWSB#67 (From CIMMYT), 775 (PI 601334), Borlaug M95 (From CIMMYT), Cajeme 71 (PI 412955), Fielder (Citr 17268), Gabo 55 (PI 583713), Hope (Citr 8178), Inia 66 (PI 412973), Kenya (PI 192099), Kentana 48 (Citr 12980), Louise (PI 634865), Marquis (Citr 3641), Prospur (Citr 17408), Prelude (Citr 4323), Spring field (Citr 14589), Sonora 64 (Citr 13930), Sterling (Citr 17859), Tadinia (PI 494096), Thatcher (PI 168659), Timstein (Citr 12347), Yaqui 50 (PI 210890), Yaqui 54 (Citr 13218), Yecora Rojo (Citr 17414) |
|                        |    | Europe        | Ladoga (Citr 4795), Peragis (PI 184582), Sol (Citr 6009)                                                                                                                                                                                                                                                                                                                                                                                                                                                                         |
|                        |    | Africa        | Kenya 58 (Citr 12471), Kenya 324 (PI 283840), Kenya C 9906 (PI 351682)                                                                                                                                                                                                                                                                                                                                                                                                                                                           |
|                        |    | South America | Americano 44D (PI 191937), Barleta (Citr 8398), Chino (Citr 12601), Klein 157 (PI 161825), Klein Lucero (Citr 14047), Napo 63 (PI 337711), Tezanos Pintos Precoz (PI 345731)                                                                                                                                                                                                                                                                                                                                                     |
|                        |    | Asia          | Aka-daruma (PI 325843), Gehun (PI 116066), NP876 (PI 322271)                                                                                                                                                                                                                                                                                                                                                                                                                                                                     |
| <b>FR-A2-T</b>         | 28 | Australia     | AUS 90168 (PI 422410), Currawa (PI 42105), Federation (PI 41080), Fife (PI 283820), Gallipoli (PI 55857), Hard federation (PI 41079), Indian F (PI 93986), Ranee (PI 67875)                                                                                                                                                                                                                                                                                                                                                      |
|                        |    | North America | Alpowa (PI 566596), Lerma 52 (PI 210887), Lerma rojo (Citr 13651), Lerma rojo 64 (Citr 13929), Lerma rojo 64A (PI 342642), Little club (Citr 4066), Red fife (PI 348919), Siete cerros 66 (PI 338921), Sonora 64A (PI 320109), White fife (Citr 4412), Yaktana 54A (PI 351913)                                                                                                                                                                                                                                                   |
|                        |    | Europe        | Heines Kolben (Citr 11772), Lutescens 62 (PI 74489), Mentana (Citr 12448), Noe (Citr 5015), Squarehead (PI 51694)                                                                                                                                                                                                                                                                                                                                                                                                                |
|                        |    | Africa        | Chile 1B (PI 320098), Red Egyptian (Citr 12345)                                                                                                                                                                                                                                                                                                                                                                                                                                                                                  |
|                        |    | South America | Frontana (Citr 12470)                                                                                                                                                                                                                                                                                                                                                                                                                                                                                                            |
|                        |    | Asia          | Aka komugi (PI 45234)                                                                                                                                                                                                                                                                                                                                                                                                                                                                                                            |

**Table S3** Genomic specific primers and PCR conditions used to amplify and sequence the *CBF12*, *CBF14* and *CBF15* homoeologs from the A, B and D genomes of hexaploid wheat

| <i>CBF</i> Gene | Forward Primer<br>(Forward 5'-3') | Reverse Primer<br>(Reverse 5'-3') | Product<br>Length (bp) | Touch down PCR<br>annealing temperatures          |
|-----------------|-----------------------------------|-----------------------------------|------------------------|---------------------------------------------------|
| <i>A12</i>      | GAGGGAAGCTGCCTTTTCTT              | ATGCCCATCATGGGTCCACAC             | 1188                   | 65-58 °C, 1 °C decline /cycle<br>58 °C, 32 cycles |
| <i>A14</i>      | CACCGCATGCAGCTAAACT               | CAATGAACGAGCACATATGGA             | 819                    | 65-58 °C, 1 °C decline /cycle<br>58 °C, 32 cycles |
| <i>A15</i>      | CAAGCATAACCAACTCCT                | ATCAAGCAGCGATGTCCTTT              | 1017                   | 65-58 °C, 1 °C decline /cycle<br>58 °C, 32 cycles |
| <i>B12</i>      | GGCAAGCCACTGTTTACTG               | GGCCTTCATATGTCCAGGAG              | 1065                   | 70-62 °C, 1 °C decline /cycle<br>62 °C, 34 cycles |
| <i>B14</i>      | TCAACGCAGCAGCTAAACAC              | CAATGAACGAGCACATACGG              | 842                    | 70-62 °C, 1 °C decline /cycle<br>62 °C, 34 cycles |
| <i>B15</i>      | CAAGCATAACCAACTCCT                | TCCATAGATCGACCTGGCT               | 971                    | 70-62 °C, 1 °C decline /cycle<br>62 °C, 34 cycles |
| <i>D12</i>      | TACGTACGACCGCTAGCTT               | CAGACTTGGCATGTCCAGAA              | 957                    | 70-62 °C, 1 °C decline /cycle<br>62 °C, 34 cycles |
| <i>D14</i>      | GATCGATCGATGGACGCCGT              | ATATCCCATCTGTTTCCTCCCG            | 725                    | 65-55 °C, 1 °C decline /cycle<br>55 °C, 30 cycles |
| <i>D15</i>      | CTCCATAGATCGACCTCGCT              | CAAAGCAGCTGGCTGGAATA              | 804                    | 60-50 °C, 1 °C decline /cycle<br>50 °C, 30 cycles |

**Table S4** Primers and probes used in the Taqman® assays for the CNV analysis at *VRN-A1* and the central cluster of the *FR-A2* locus. *VRN-A1* and *CO2* assays adapted from Díaz et al. (2012).

| Gene           | F primer (5'-3')     | R primer (5'-3')        | Taqman® Probe                      |
|----------------|----------------------|-------------------------|------------------------------------|
| <i>VRN-A1</i>  | GCAGCCCACTTTGGTCTCTA | TCTGCCCTCTCGCCTGTT      | FAM-TGTGTTTCGCTTTGGTTGTGCAGCA-BHQ1 |
| <i>CBF-A12</i> | GCCAGACAATGCCAGCTC   | ACATGTCGTGGCACAATGC     | FAM-TCGGCGGGCGGGCCCACTCACA-BHQ1    |
| <i>CBF-A14</i> | TTGAATGAGCACTGGTTTGG | CACCGAGCTCAAAGTCTTCC    | FAM-TCCATGAACTCCGAGTAGCA-BHQ1      |
| <i>CBF-A15</i> | GTCGTCCATGAAAAATACCG | ATGTGTCCAGGTCCATTCC     | FAM-TCGTCGTCGTCGTCCTACCTTCT-BHQ1   |
| <i>CO2</i>     | TGCTAACCGTGTGGCATCAC | GGTACATAGTGCTGCTGCATCTG | CY5-CATGAGCGTGTGCGTGTCTGCG-BHQ3    |

---

**Table S5** *T. dicoccoides* accessions assayed and their FR-A2 haplotype.

| <i>T. dicoccoides</i> sub-population | FR-A2 haplotype | N | Accessions                                                                                   |
|--------------------------------------|-----------------|---|----------------------------------------------------------------------------------------------|
| Northern (Iraq, Turkey)              | S               | 4 | UH42, UH43, UH44, PI 428017                                                                  |
|                                      | T               | 9 | UH41, PI 428020, PI 428028, PI 428036, PI 428041, PI 428047, PI 428055, PI 428058, PI 428061 |
| Southern (Israel, Lebanon)           | S               | 8 | UH7, UH9, UH11, UH17, UH19, UH24, UH30, UH33                                                 |
|                                      | T               | 4 | UH1, UH23, UH27, UH32                                                                        |

Accession numbers are either PI numbers from the GRIN database, or correspond to 'Location-Genotype' identification numbers from the University of Haifa (UH) wheat germplasm collection (Nevo and Beiles 1989; Peleg et al. 2005).

---

**Table S6** qRT-PCR primers used in this study and their amplification efficiencies

| <b>Target</b>       | <b>Forward primer (5' – 3')</b> | <b>Reverse primer (5' – 3')</b> | <b>Efficiency (%)</b> |
|---------------------|---------------------------------|---------------------------------|-----------------------|
| <i><b>CBF12</b></i> | GCCAGACAATGCCAGCTC              | ACATGTCGTGGCACAATGC             | 92.3                  |
| <i><b>CBF14</b></i> | CCACCAAATATGGGAGGAAA            | GCTTTCACAATGAACGAGCA            | 93.8                  |
| <i><b>CBF15</b></i> | CATGTTTCGAGCTGGATAATGTCGGGG     | CAGCTTCGGTTTGTTCATGC            | 96.4                  |
| <i><b>ACTIN</b></i> | ACCTTCAGTTGCCAGCAAT             | CAGAGTCGAGCACAATACCAGTTG        | 99.1                  |



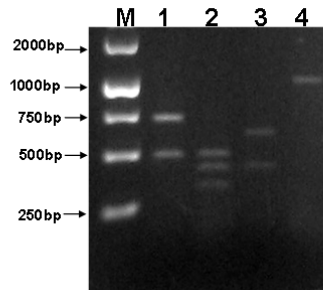

**Fig. S1** CAP markers used to distinguish *FR-A2* haplotypes. Lane M: DNA marker

Lane 1: *CBF-A12* band type for 'FR-A2-S'. Lane 2: *CBF-A12* band type for 'FR-A2-T' (*CBF-A12* was digested with *ZraI*). Lane 3: *CBF-A15* band type for 'FR-A2-S'. Lane 5: *CBF-A15* band type for 'FR-A2-T' (*CBF-A15* was digested with *Sall*).
